# Supplementary material
Source: ML conference proceedings conference paper supplement (https://openreview.net/forum?id=1cA6OYsfoJ)

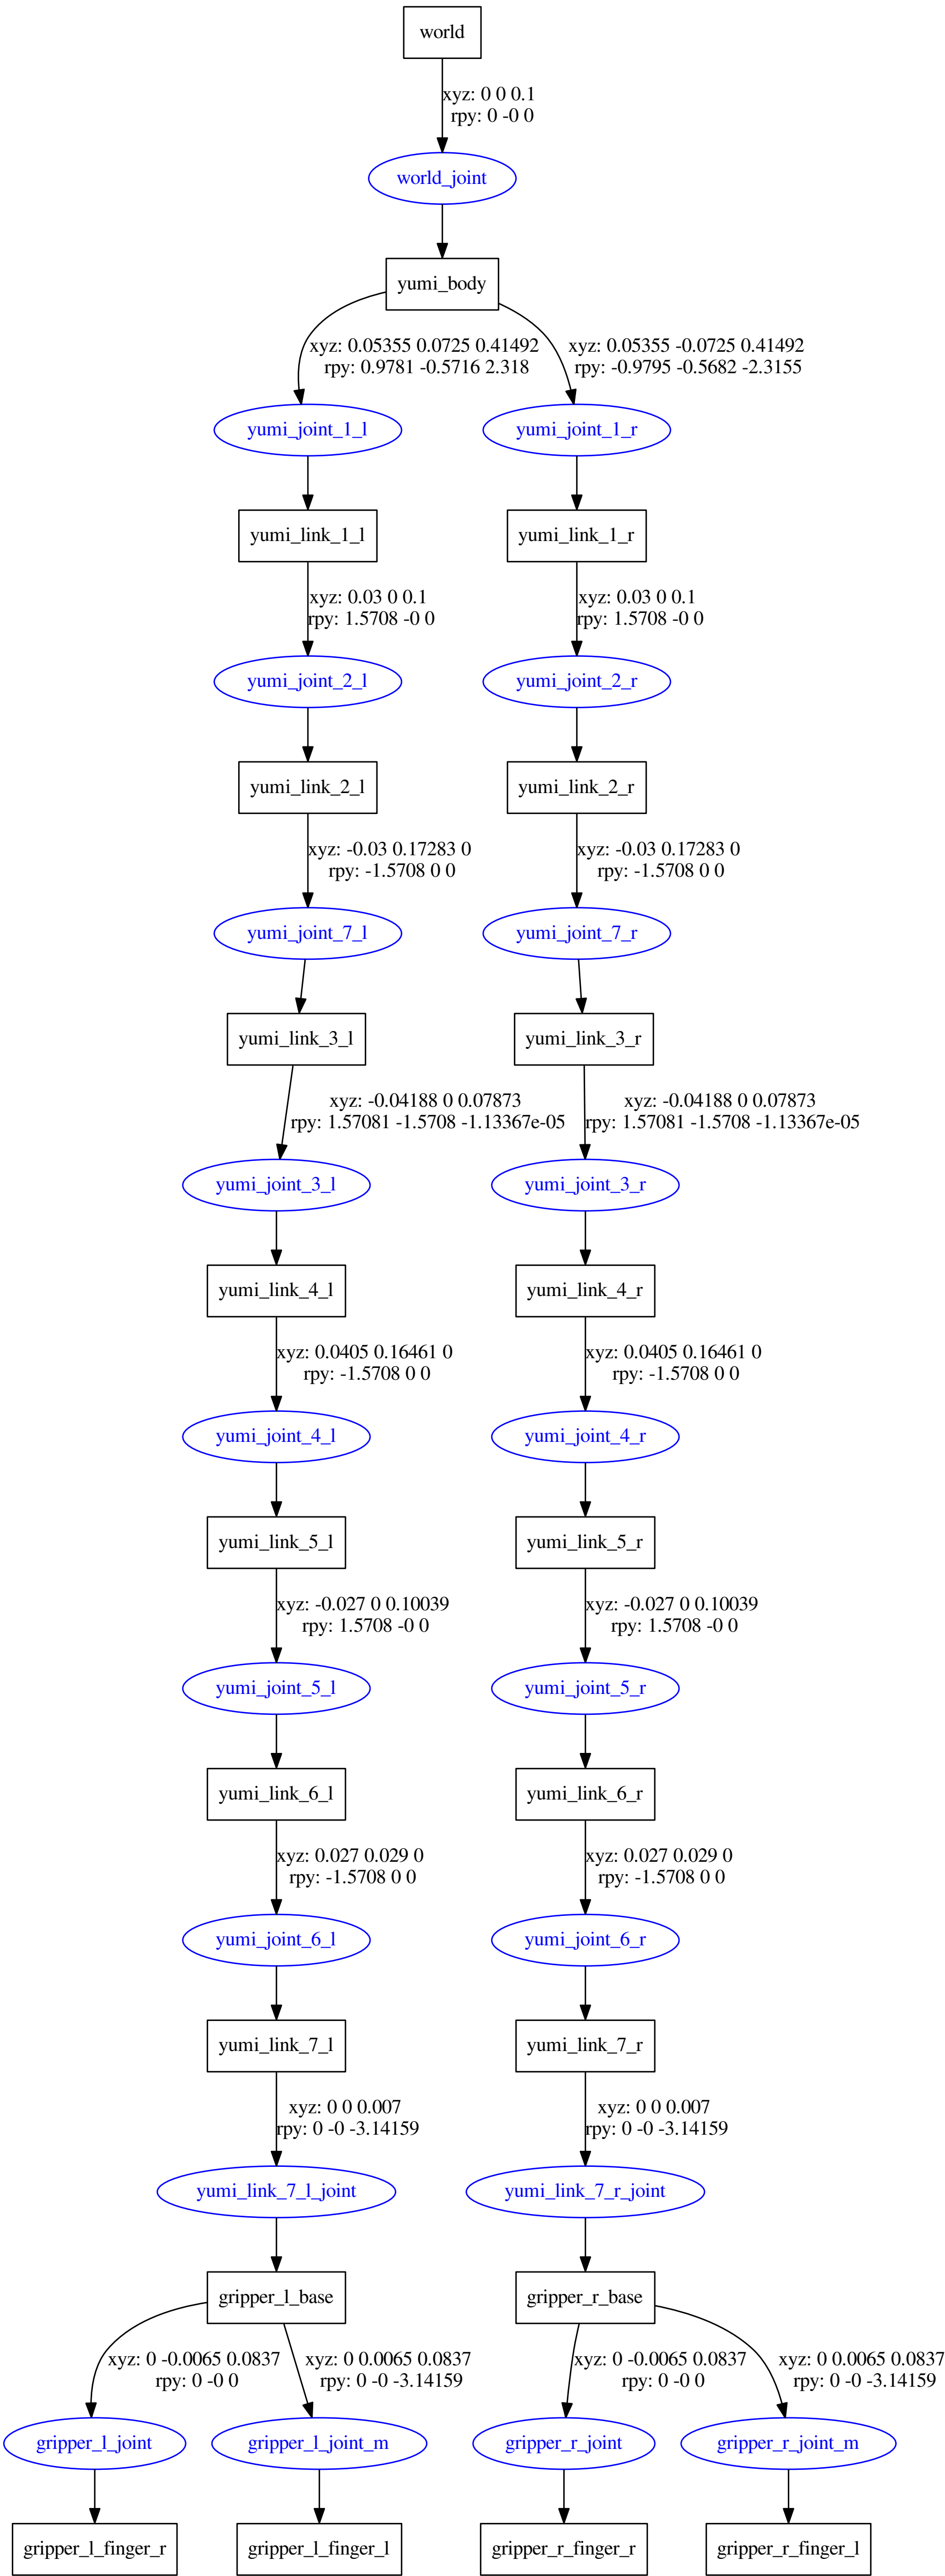

Supplement: supplementary_material [file yumi.pdf › LAMP-master-2/src/robot_files/yumi/URDF/yumi.pdf]
